# Supplementary material for: Emerging Vibrio risk at high latitudes in response to ocean warming
Source: Springer Nature journal article supplement (doi:10.1038/nclimate1628), 2012-07-20

Emerging *Vibrio* risk at high latitudes in response to ocean warming

**Supplementary Fig. 1.** Warming trends in the Baltic region. A, maximum (red) and average (blue) summer SST from 1982 and the corresponding linear regression lines. B, monthly linear regression slopes for SST calculated using a 10-year step since 1854 showing a strong warming signal for analysis comprising a higher percentage of recent SST fields.

**Supplementary Fig. 2.** Histogram of observed distribution of *vibrio* infections observed annually. Solid line shows best fit prediction based on a negative binomial distribution,  $k$  = shape parameter,  $\mu$  = average number of cases.

**Supplementary Fig. 3.** Remote sensing analysis of the Baltic during an 'at risk' period: A: 27th July 2006: SST field over the Baltic Sea region. Peak temperatures in the region were maximum during this month and B: average conditions for that date between 1982-2010. C: SST anomaly map showing the high, abnormal temperatures in the Baltic during this period, and D: corresponding daily risk analysis.

**Supplementary Fig. 4.** Risk maps showing the highest (summer) values for selected years over the period 1988-2010. The risk model for *V. vulnificus* infections was constructed based on observed SST and salinity. Low salinity areas (< 25 ppt NaCl) allows to delineate the region suitable for the occurrence of *V. vulnificus*, while SST acts as a predictor of risk, which is defined from the number of cases in relation to changes in SST according to the GLM model.

**Supplementary Fig. 5.** Average sea surface salinity conditions in the Western Atlantic and Euro-Asiatic border obtained from the World Ocean Atlas (NOAA/NODC). Salinity fields are based on average decadal (1955-2006) datasets that include salinity profile data from multiple sources, such as bottle samples, ship-deployed Conductivity-Temperature-Depth (CTD) sensors, profiling floats, and moored and drifting buoys.

### Supplementary Table 1.

```
Cases ~ Year + Maxtemp, family = quasipoisson, link function = ln)
Deviance Residuals:
  Min       1Q   Median       3Q      Max
-2.901   -1.34   -0.41    0.91    3.87

Coefficients:
      Estimate exp(Estimate)   Std. Error t value   Pr(>|t|)
Intercept  -187.47   3.83e-82   41.64    -4.50   0.0001
Year         0.09    1.09      0.02     4.23   0.0003
Max SST      0.66    1.93      0.13     5.15  2.54e-05

Dispersion parameter for quasipoisson family taken to be 3.65
Null deviance: 402.08 on 27 degrees of freedom
Residual deviance: 69.72 on 25 degrees of freedom
Reduction in deviance = 332, Df = 2, P(>|Chi|) <2.2e-16
Number of Fisher Scoring iterations: 5
```

Supplementary Table 1. GLM results investigating the relationship between observed wound associated *Vibrio* infections in the Baltic Sea region and maximum SST and time (years).

## Supplementary Table 2

| Year      | Countries reporting cases                                            | Number of cases | Species of infections                                                                                                           |
|-----------|----------------------------------------------------------------------|-----------------|---------------------------------------------------------------------------------------------------------------------------------|
| 1985-1993 | Finland, Denmark, (Netherlands, Belgium)                             | 9               | <i>V. vulnificus</i> , <i>V. cholerae</i> (non O1)                                                                              |
| 1994      | Germany, Sweden, Denmark, Finland                                    | 21              | <i>V. vulnificus</i> , <i>V. cholerae</i> (non O1), <i>V. alginolyticus</i>                                                     |
| 1995      | Denmark, Finland, Estonia                                            | 8               | <i>V. vulnificus</i> , <i>V. cholerae</i> (non O1)                                                                              |
| 1996      | Denmark, Finland                                                     | 2               | <i>V. cholerae</i> (non O1)                                                                                                     |
| 1997      | Sweden, Finland, Denmark                                             | 21              | <i>V. vulnificus</i> , <i>V. cholerae</i> (non O1), <i>V. alginolyticus</i> , <i>V. damsela</i>                                 |
| 1998      | Finland, Denmark                                                     | 6               | <i>V. cholerae</i> (non O1)                                                                                                     |
| 1999      | Finland                                                              | 8               | <i>V. cholerae</i> (non O1), <i>V. fluvialis</i>                                                                                |
| 2000      | Finland                                                              | 5               | <i>V. cholerae</i> (non O1), <i>V. parahaemolyticus</i>                                                                         |
| 2001      | Finland, Sweden                                                      | 11              | <i>V. cholerae</i> (non O1), <i>V. parahaemolyticus</i> , <i>V. vulnificus</i>                                                  |
| 2002      | Germany, Finland                                                     | 10              | <i>V. cholerae</i> (non O1), <i>V. vulnificus</i>                                                                               |
| 2003      | Finland, Germany, Sweden                                             | 19              | <i>V. cholerae</i> (non O1), <i>V. vulnificus</i>                                                                               |
| 2004      | Finland, Sweden                                                      | 6               | <i>V. cholerae</i> (non O1), <i>V. parahaemolyticus</i> , <i>Vibrio</i> spp*                                                    |
| 2005      | Finland, Sweden                                                      | 9               | <i>V. cholerae</i> (non O1), <i>V. parahaemolyticus</i> , <i>Vibrio</i> spp*                                                    |
| 2006      | Germany, Denmark, Sweden, Poland,<br>Finland, Estonia, (Netherlands) | 67              | <i>V. vulnificus</i> , <i>V. cholerae</i> (non O1), <i>V. alginolyticus</i><br><i>V. parahaemolyticus</i> , <i>Vibrio</i> spp*  |
| 2007      | Finland, Sweden                                                      | 14              | <i>V. cholerae</i> (non O1), <i>Vibrio</i> spp*                                                                                 |
| 2008      | Sweden, Finland, (Netherlands)*                                      | 13              | <i>V. vulnificus</i> , <i>Vibrio</i> spp*                                                                                       |
| 2009      | Finland, Sweden, Germany, (Netherlands)                              | 15              | <i>V. cholerae</i> (non O1), <i>V. parahaemolyticus</i> , <i>V. alginolyticus</i> , <i>Vibrio</i> spp.                          |
| 2010      | Finland, Sweden, Germany, (Netherlands)                              | 36              | <i>V. cholerae</i> (non O1), <i>V. parahaemolyticus</i> , <i>V. alginolyticus</i> , <i>V. vulnificus</i><br><i>Vibrio</i> spp*. |

Supplementary Table 2. *Vibrio* cases reported per year in the Baltic Sea region, 1985-2010.

### Supplementary Table 3

| Year | Countries reporting cases | Number of fatalities | Species responsible                                  |
|------|---------------------------|----------------------|------------------------------------------------------|
| 1994 | Germany, Denmark,         | 2                    | <i>V. vulnificus</i> ,                               |
| 1997 | Sweden                    | 2                    | <i>V. vulnificus</i> ,                               |
| 2003 | Finland, Germany          | 2                    | <i>V. cholerae</i> (non O1), <i>V. vulnificus</i>    |
| 2006 | Sweden, Germany           | 5                    | <i>V. cholerae</i> (non O1), <i>V. vulnificus</i>    |
| 2009 | Germany                   | 1                    | <i>V. alginolyticus</i> / <i>V. parahaemolyticus</i> |
| 2010 | Germany                   | 2                    | <i>V. cholerae</i> (non O1), <i>V. vulnificus</i>    |

Supplementary Table 3. Reported fatalities in the Baltic Sea region associated with vibrios, 1994-2010

Figure S1

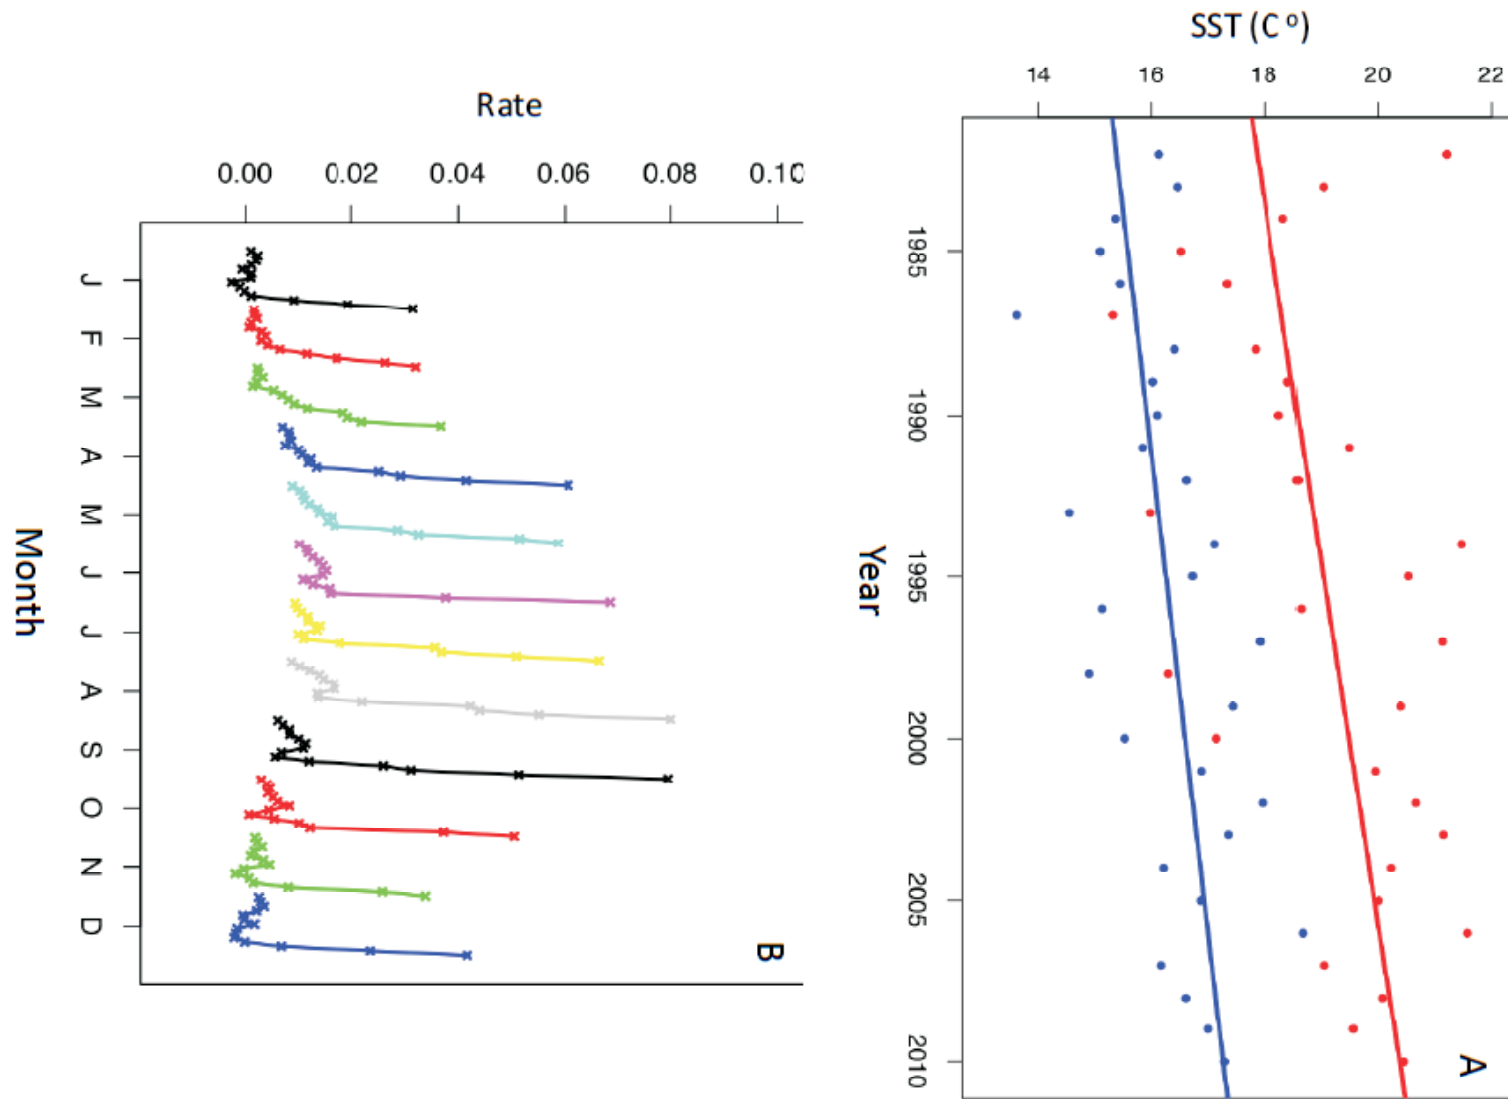

Figure S2

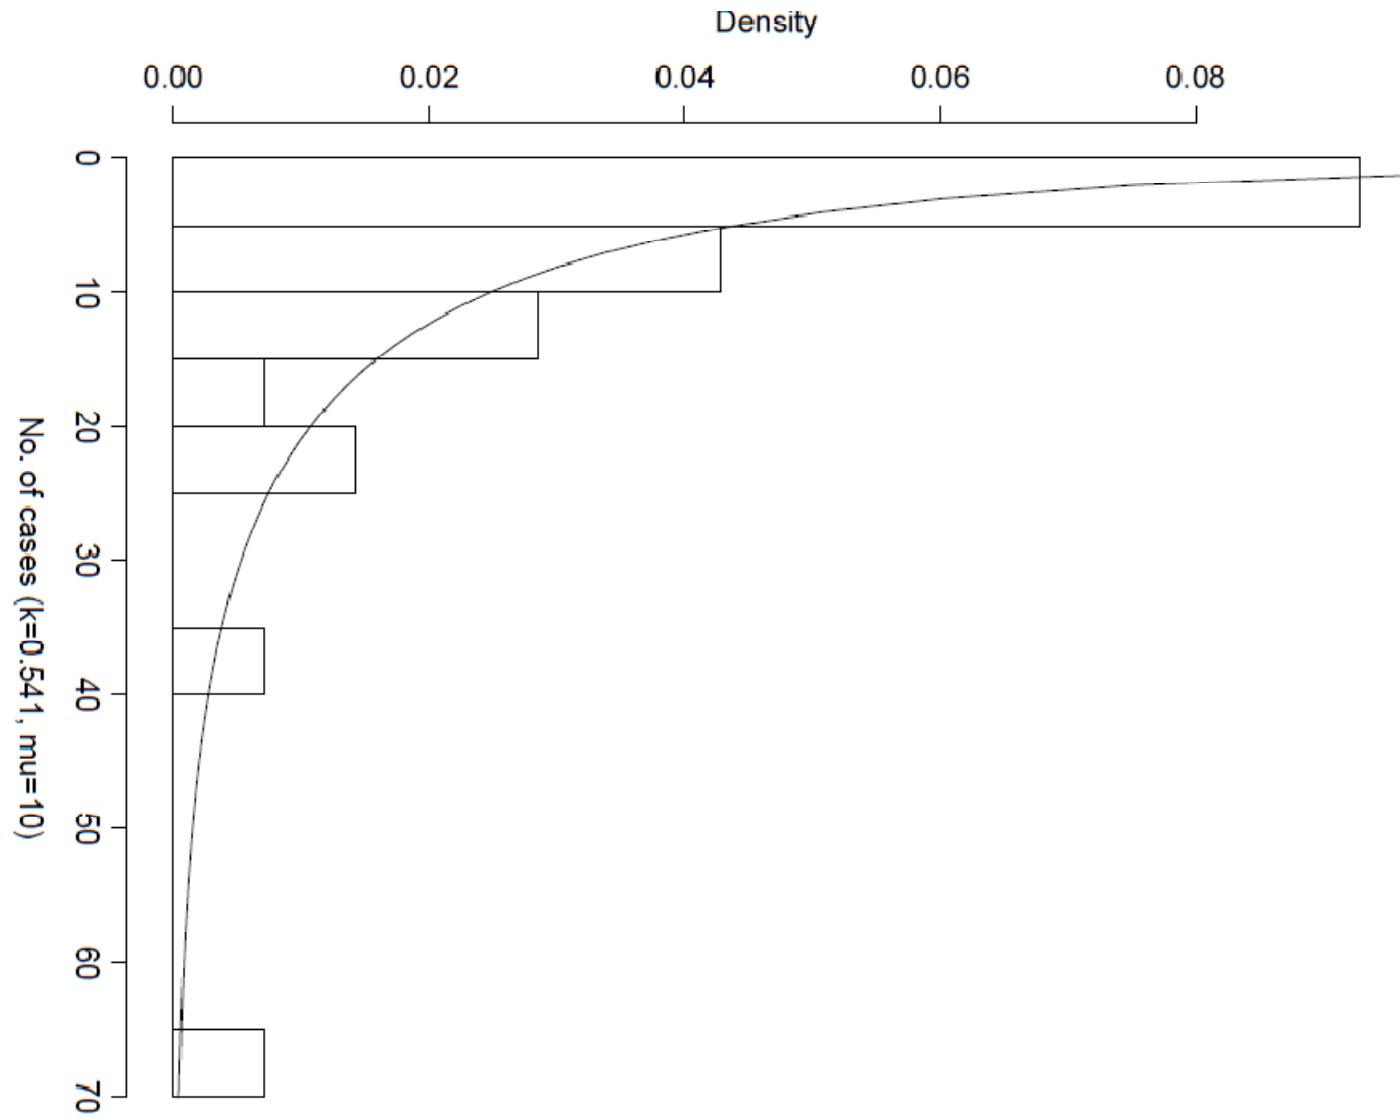

figure S3

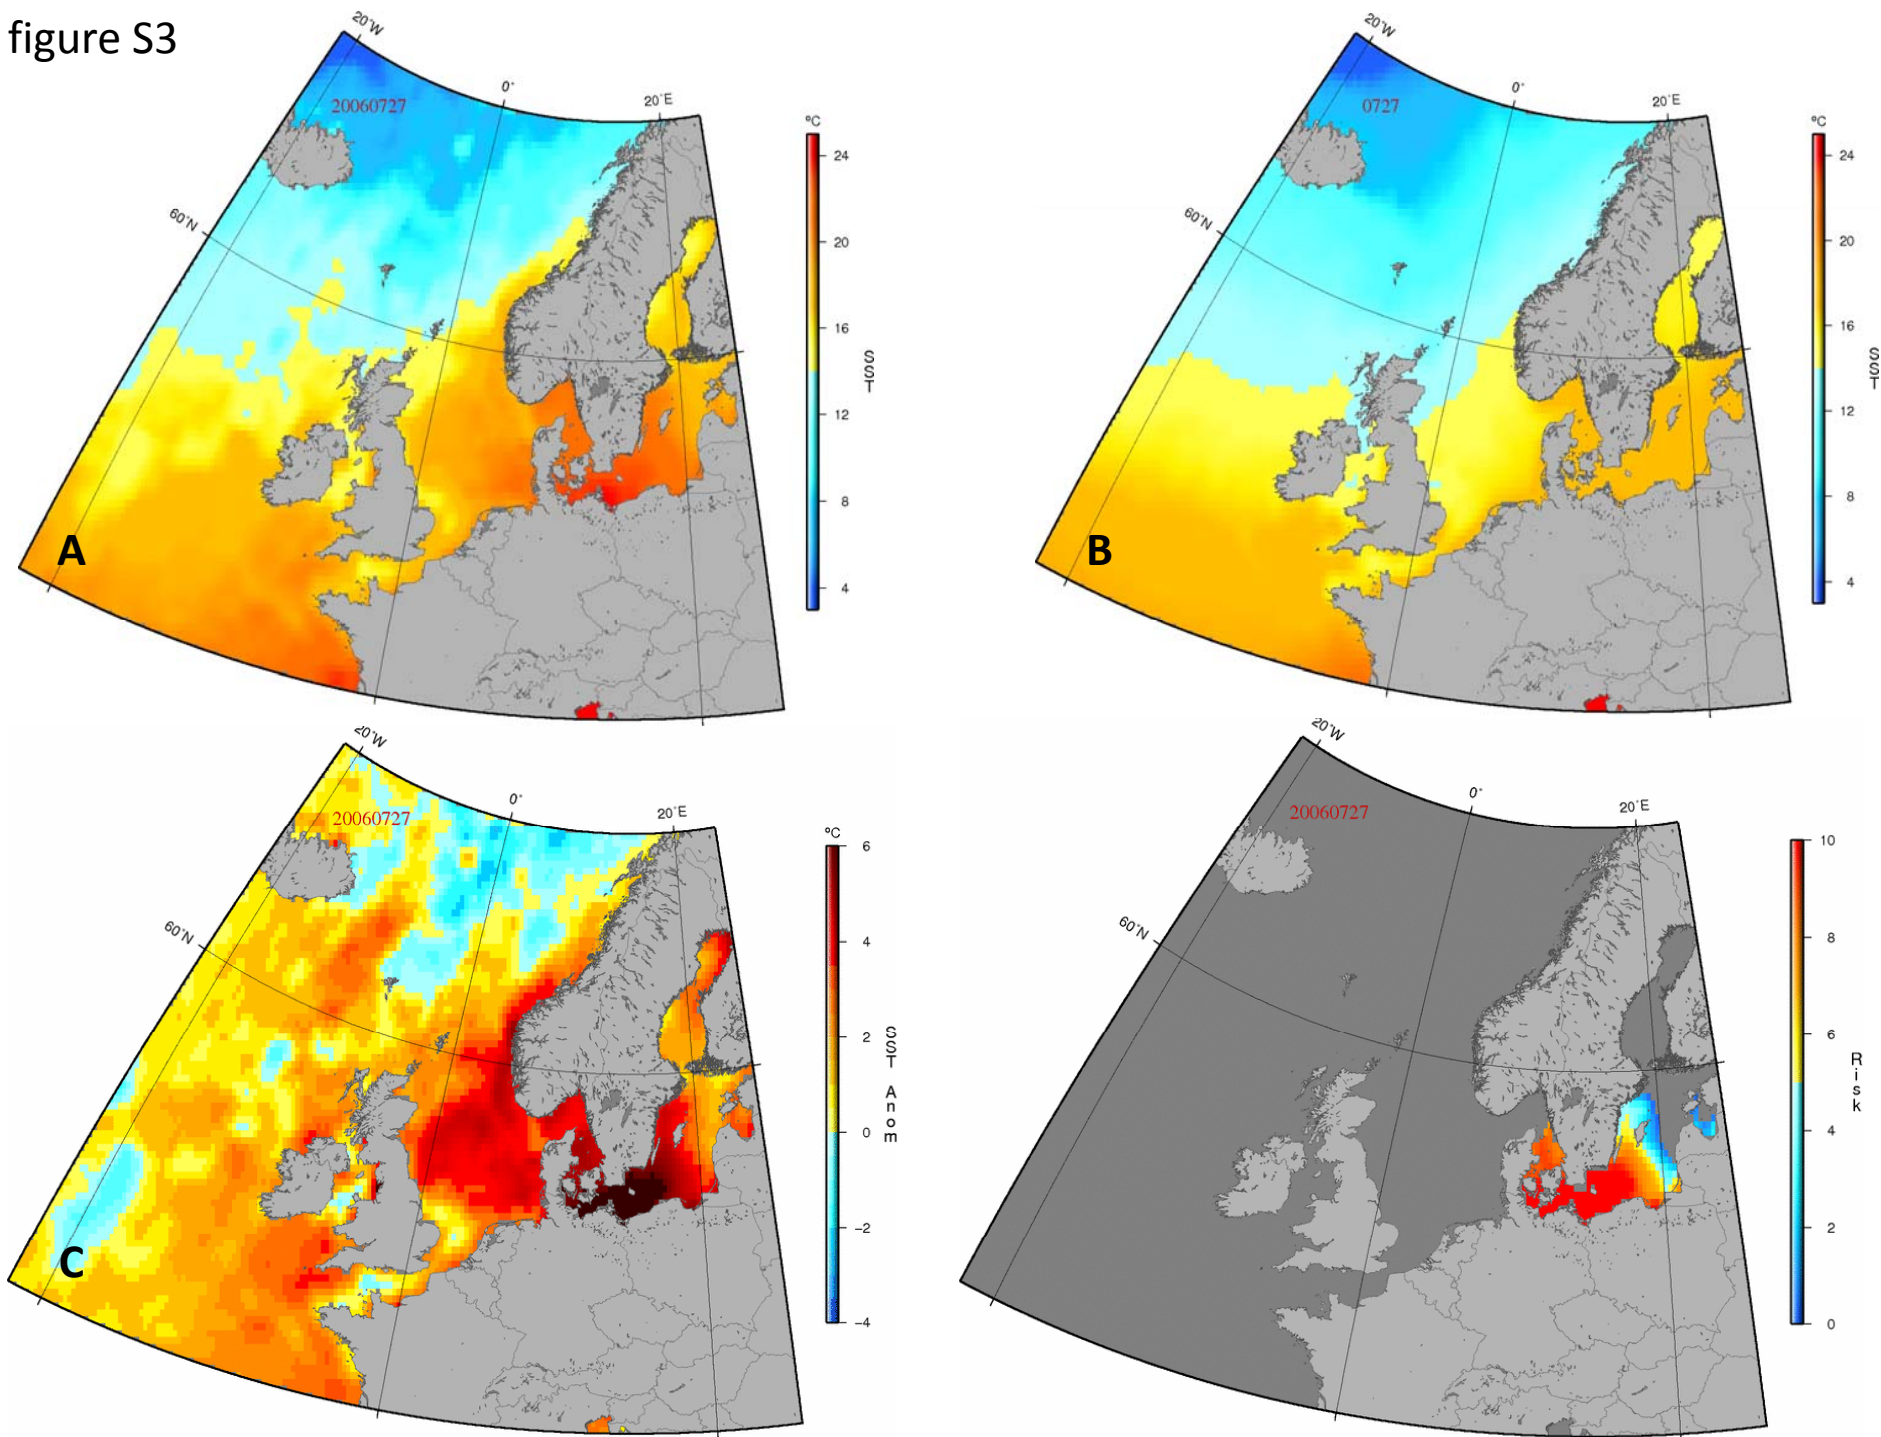

figure S4

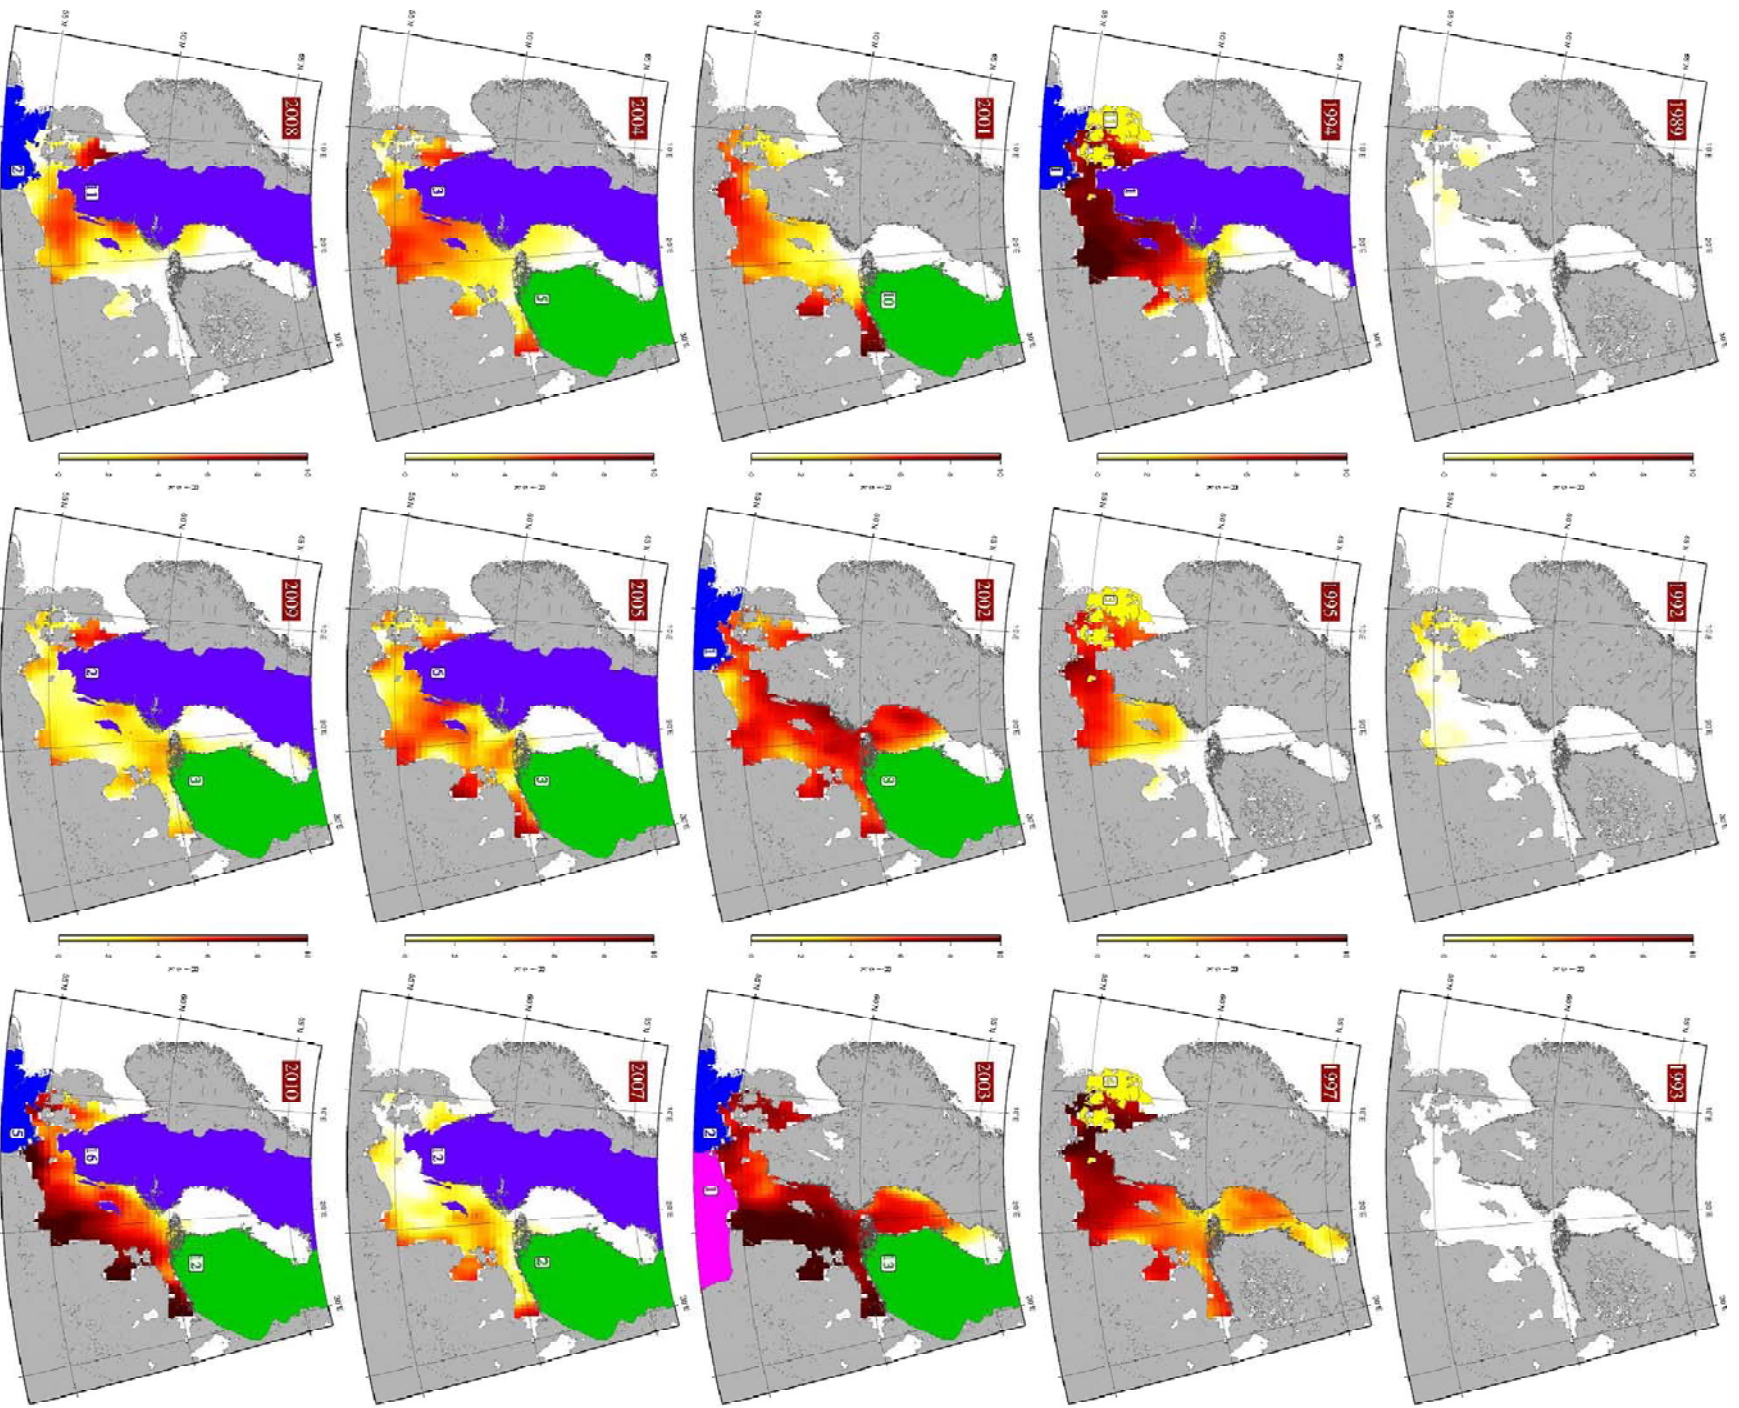



figure S5

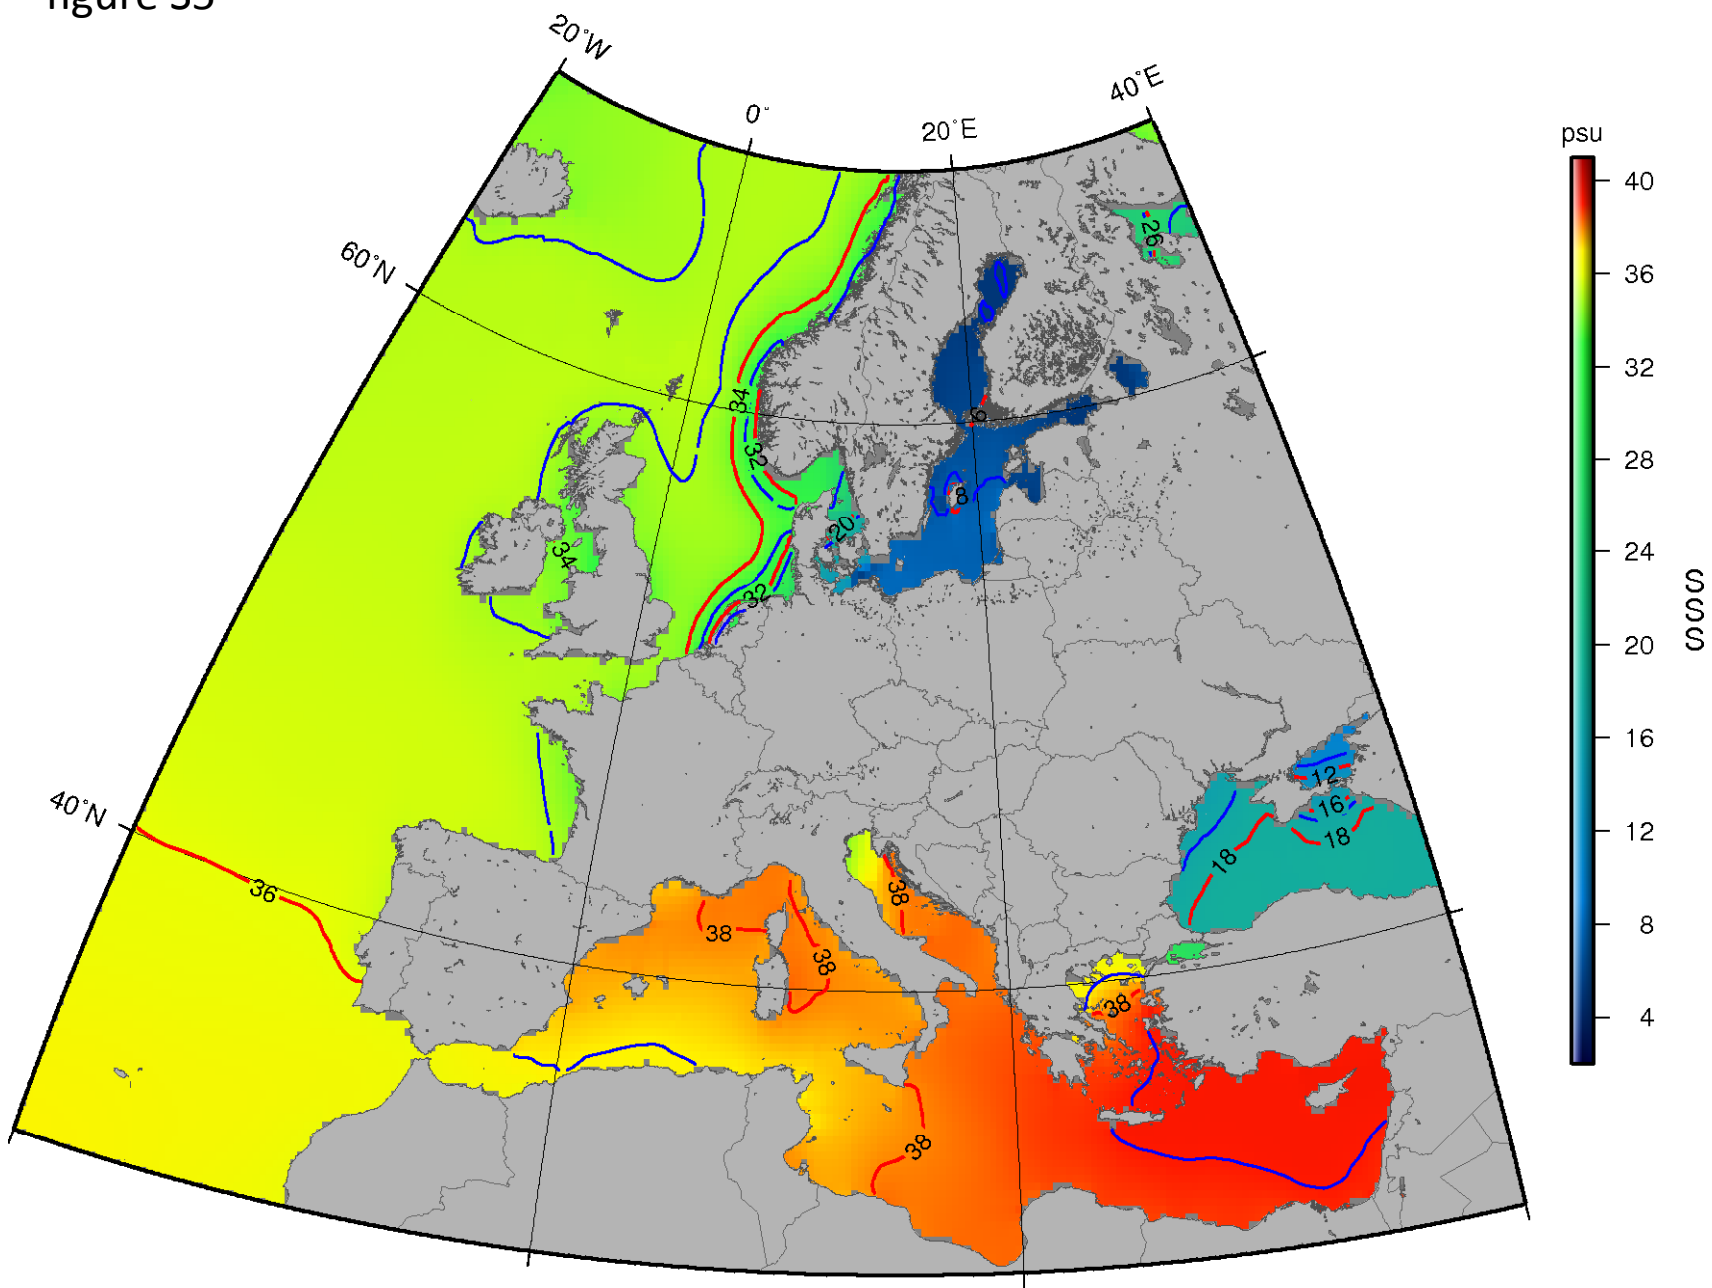

Supplement: 41558_2013_BFnclimate1628_MOESM351_ESM.pdf [file 41558_2013_BFnclimate1628_MOESM351_ESM.pdf]
